# Supplementary material for: The synthesis and characterisation of europium terpyridine-N-oxide complexes
Source: Royal Society of Chemistry journal article supplement (doi:10.1039/b616758f), 2007-01-01
Supplement: b616758f.pdf [file b616758f.pdf]

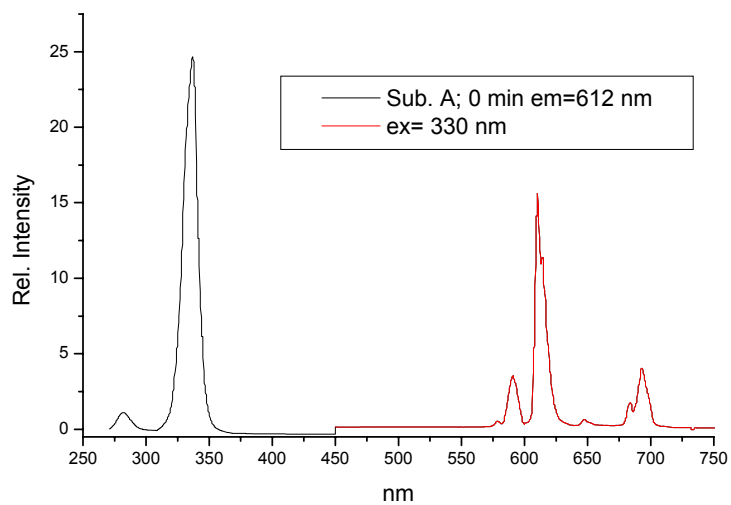

Excitation and Emission spectra of a 0.145mM CH<sub>3</sub>CN solution of **1**

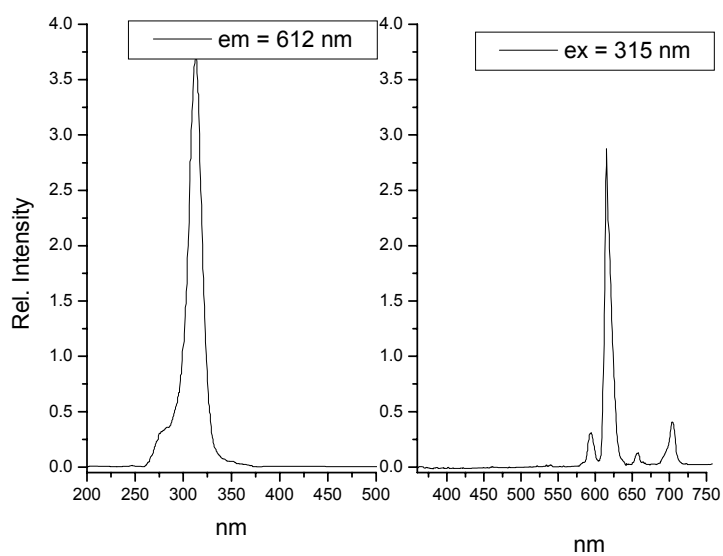

Excitation and Emission spectra of a 0.152mM CH<sub>3</sub>CN solution of **2**

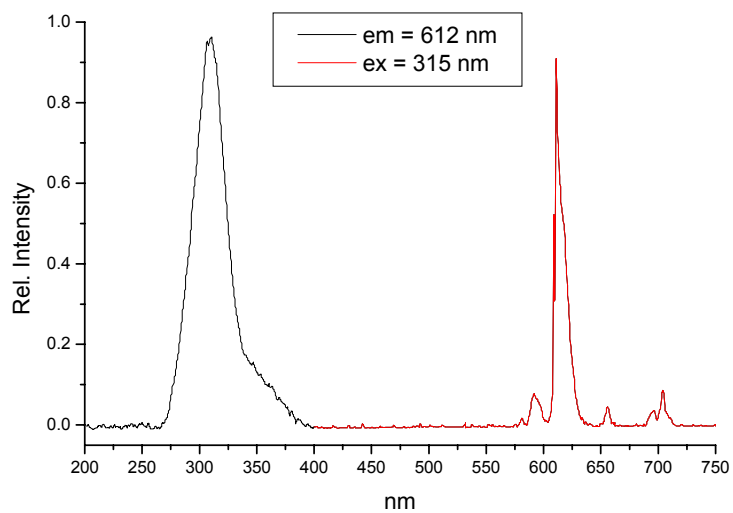

Excitation and Emission spectra of a 0.146mM CH<sub>3</sub>CN solution of **3**
